# Supplementary material
Source: PubMed Central journal article supplement (PMC3982160)
Supplement: supp_btu004_allerdictor-supplement.pdf [file supp_btu004_allerdictor-supplement.pdf]

## **Allerdicator supplementary document**

Ha X. Dang<sup>1</sup> and Christopher B. Lawrence<sup>1,2,\*</sup>

<sup>1</sup>Virginia Bioinformatics Institute, Virginia Tech, Blacksburg, Virginia, USA.

<sup>2</sup>Department of Biological Sciences, Virginia Tech, Blacksburg, Virginia, USA.

---

---

\*to whom correspondence should be addressed

---

**Table S1.** Statistics on  $k$ -mers learned from three datasets A, B, and C in relation with 183 known IgE epitopes coming from 29 allergens.

| Training data | Total $k$ -mers learned | IgE epitope-matched $k$ -mers | Matched IgE epitopes * | Allergens of matched IgE epitopes |
|---------------|-------------------------|-------------------------------|------------------------|-----------------------------------|
| Dataset A     | 9,082,690               | 1,238                         | 174                    | 25                                |
| Dataset B     | 5,654,846               | 1,222                         | 174                    | 25                                |
| Dataset C     | 4,561,099               | 1,068                         | 170                    | 25                                |

\* not all epitopes are matched with  $k$ -mers due to some variations in the collected sequences as well as the removal of some allergen sequences in data preparation.

**Table S2.** Default performance measures of current methods on test set X of 167 allergens and 1,663 non-allergens randomly drawn from dataset C.

| Method       | TP  | FP  | TN   | FN | Recall | Precision | Accuracy | MCC  |
|--------------|-----|-----|------|----|--------|-----------|----------|------|
| AllerHunter* | 90  | 43  | 1620 | 70 | 0.56   | 0.68      | 0.94     | 0.58 |
| AlgPred-c*   | 133 | 860 | 803  | 34 | 0.80   | 0.13      | 0.51     | 0.16 |
| AlgPred-d    | 125 | 766 | 897  | 42 | 0.75   | 0.14      | 0.56     | 0.17 |
| APPEL*       | 67  | 49  | 1614 | 93 | 0.42   | 0.58      | 0.92     | 0.45 |
| EVALLER*     | 106 | 100 | 1560 | 61 | 0.63   | 0.51      | 0.91     | 0.52 |
| SORTALLER    | 144 | 354 | 1323 | 23 | 0.86   | 0.29      | 0.80     | 0.42 |

TP - true positive, FP - false positive, TN - true negative, FN - false negative, MCC - Mathews correlation coefficient

\* server returned error on a few (<10) sequences

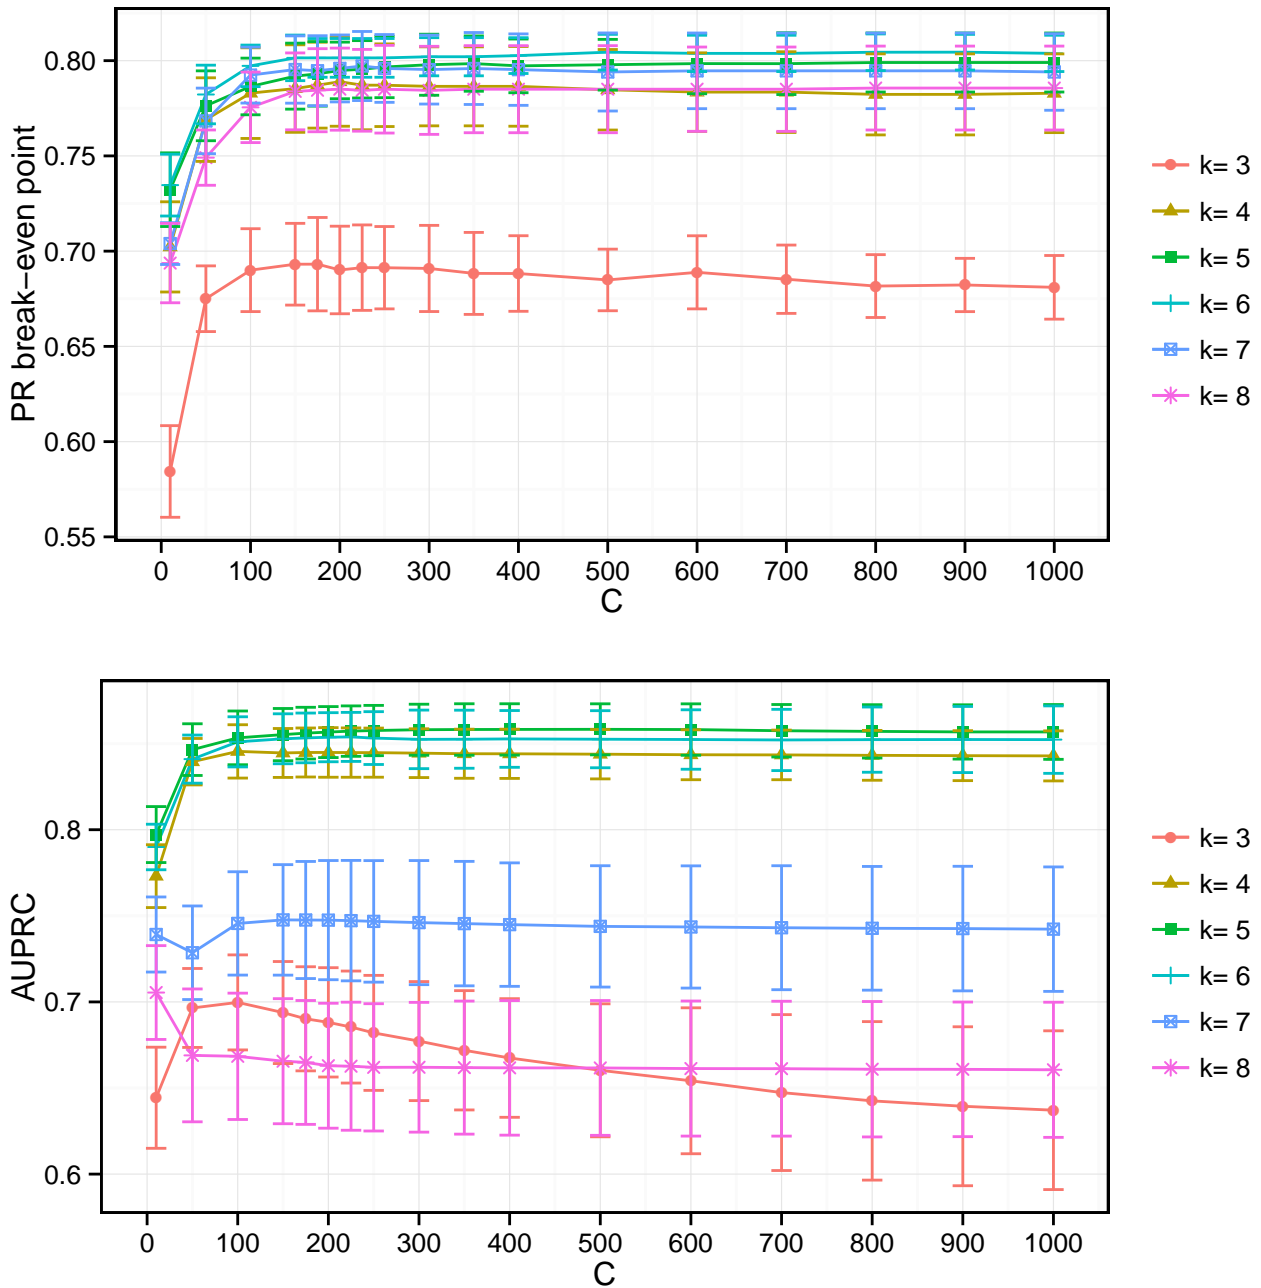

**Fig. S1.** AUPRCs and PR break-even points for Allerdicator 10-fold cross-validation on dataset C, with the different  $k$ -mer length ( $k$ ) and regularization parameter ( $C$ ) of the SVM model. The error bars show standard deviations of performance scores of 10 fold evaluation.

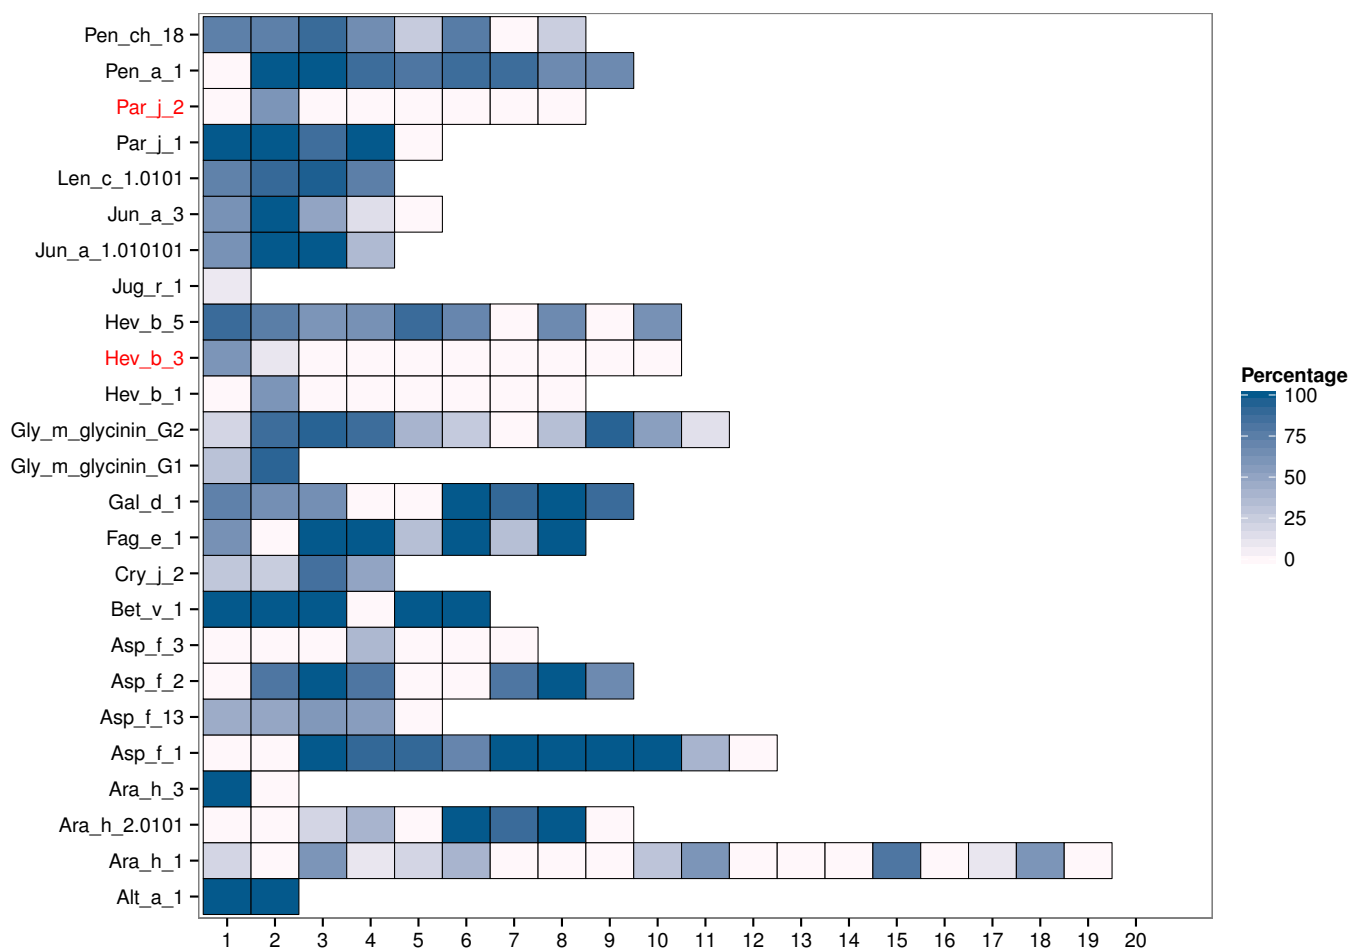

**Fig. S2.** Epitope coverage by high scoring regions for allergens with known IgE epitopes. High scoring regions were formed by merging consecutive  $k$ -mers that ranked in the top 25,000. Each box represents one epitope sequence (color density indicates percentage of an epitope covered by high scored regions). Sequences predicted to be allergen are labeled in black /non-allergen are in red. Training was performed on dataset A (known-epitope allergens and sequences that had a BLAST HSP of  $\geq 99\%$  identity with these allergens were removed from training data).

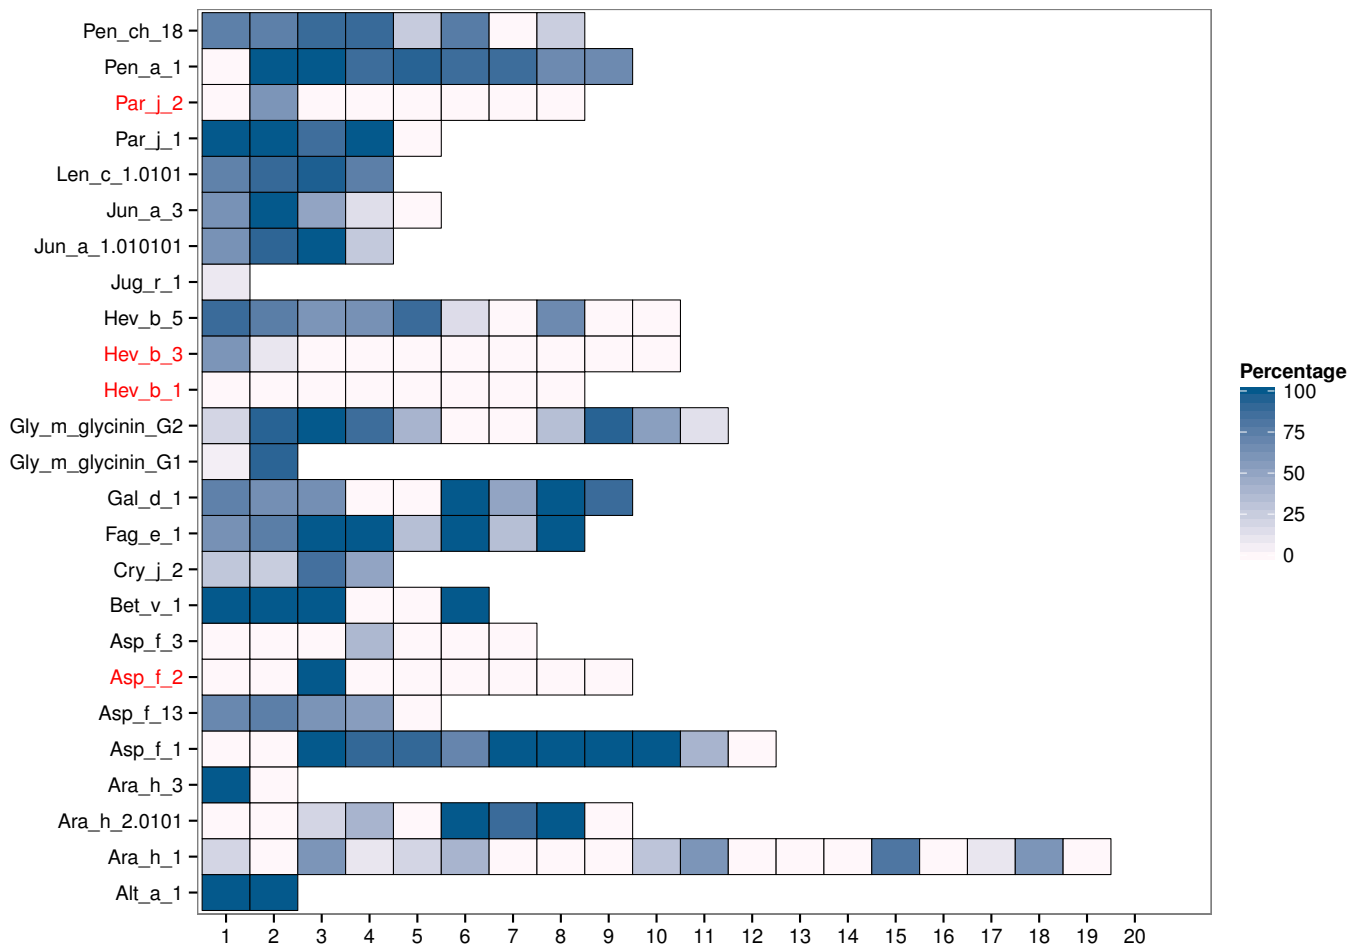

**Fig. S3.** Epitope coverage by high scoring regions for allergens with known IgE epitopes. High scoring regions were formed by merging consecutive  $k$ -mers that ranked in the top 25,000. Each box represents one epitope sequence (color density indicates percentage of an epitope covered by high scored regions). Sequences predicted to be allergen are labeled in black /non-allergen are in red. Training was performed on dataset B (known-epitope allergens and sequences that had a BLAST HSP of  $\geq 99\%$  identity with these allergens were removed from training data).

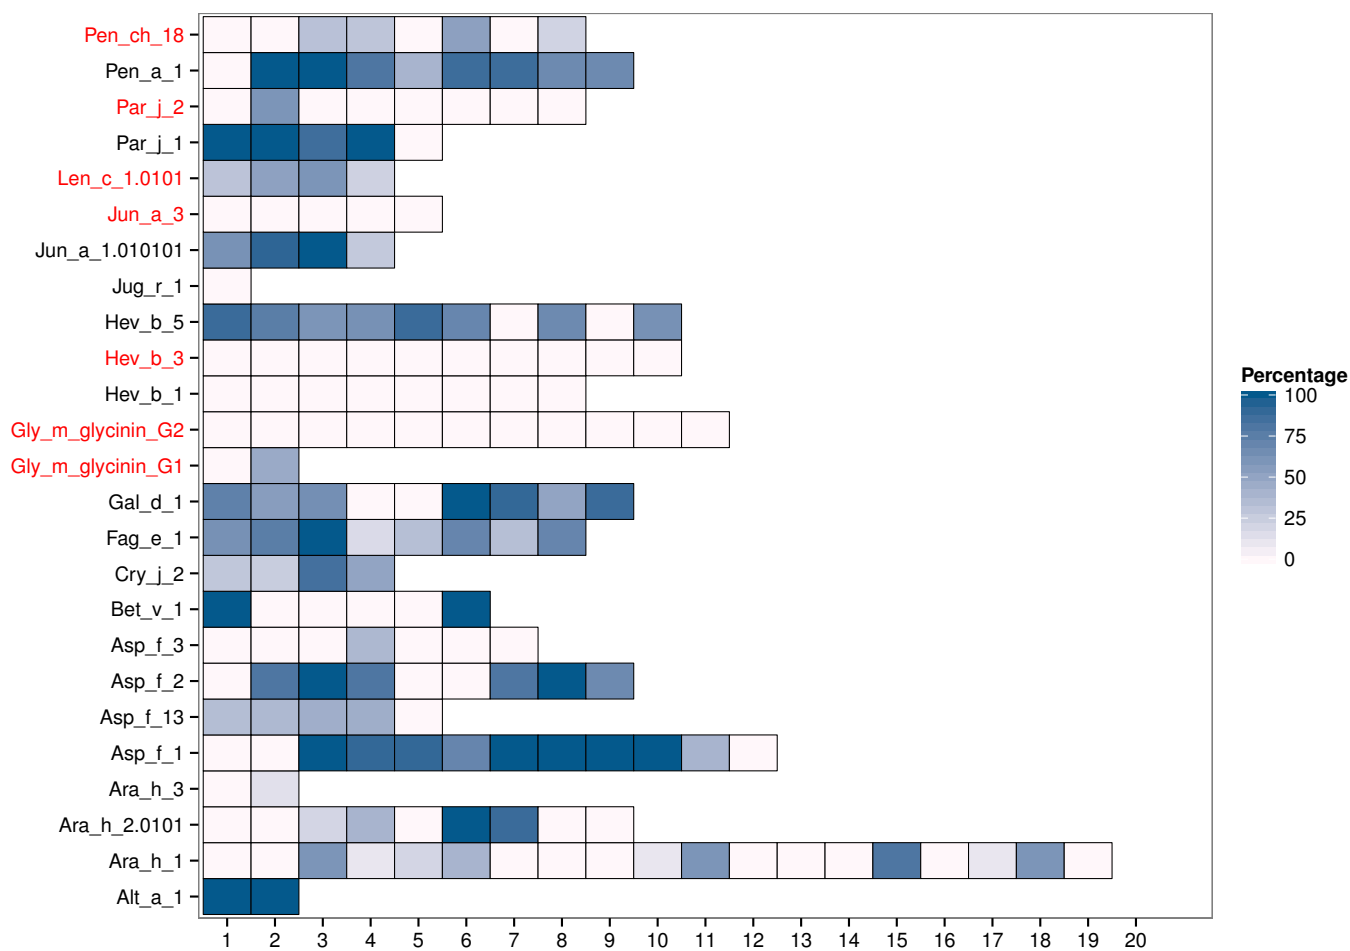

**Fig. S4.** Epitope coverage by high scoring regions for allergens with known IgE epitopes. High scoring regions were formed by merging consecutive  $k$ -mers that ranked in the top 25,000. Each box represents one epitope sequence (color density indicates percentage of an epitope covered by high scored regions). Sequences predicted to be allergen are labeled in black /non-allergen are in red. Training was performed on dataset C (known-epitope allergens and sequences that had a BLAST HSP of  $\geq 99\%$  identity with these allergens were removed from training data).

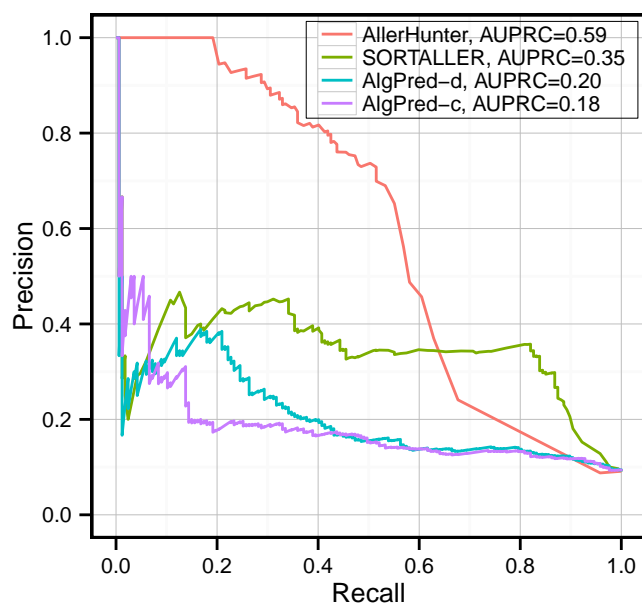

**Fig. S5.** PR curves for AllerHunter, AlgPred composition (AlgPred-c), AlgPred dipeptide (AlgPred-d), and SORTALLER on a test set of 167 allergens and 1,663 non-allergens randomly drawn from dataset C.

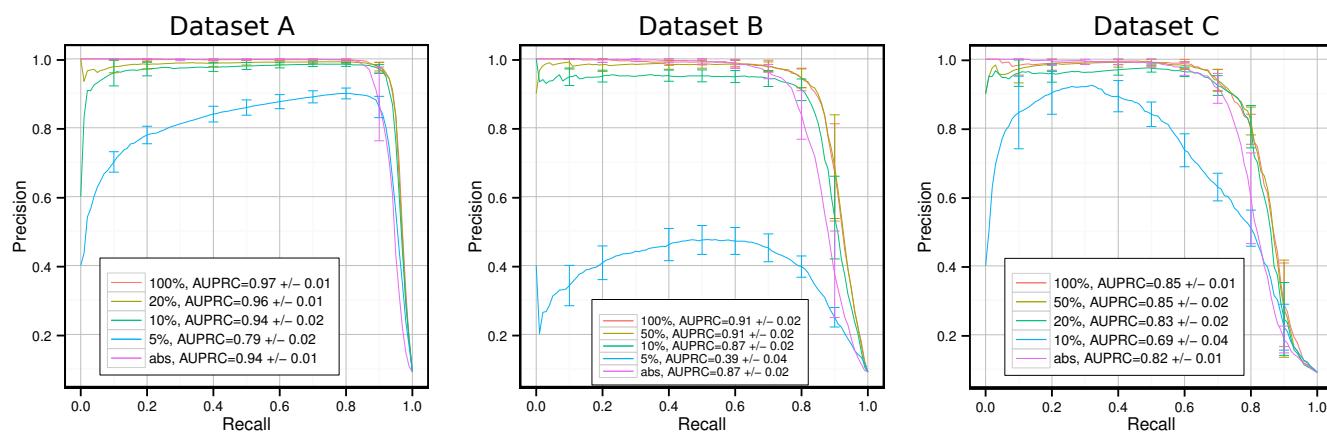

**Fig. S6.** PR curves for mutual information based feature selection (at 5%-100% top  $k$ -mers selected) and feature abstraction (abs) on datasets A, B, and C. The curves are average of 10-fold cross-validation with standard deviations as error bars.

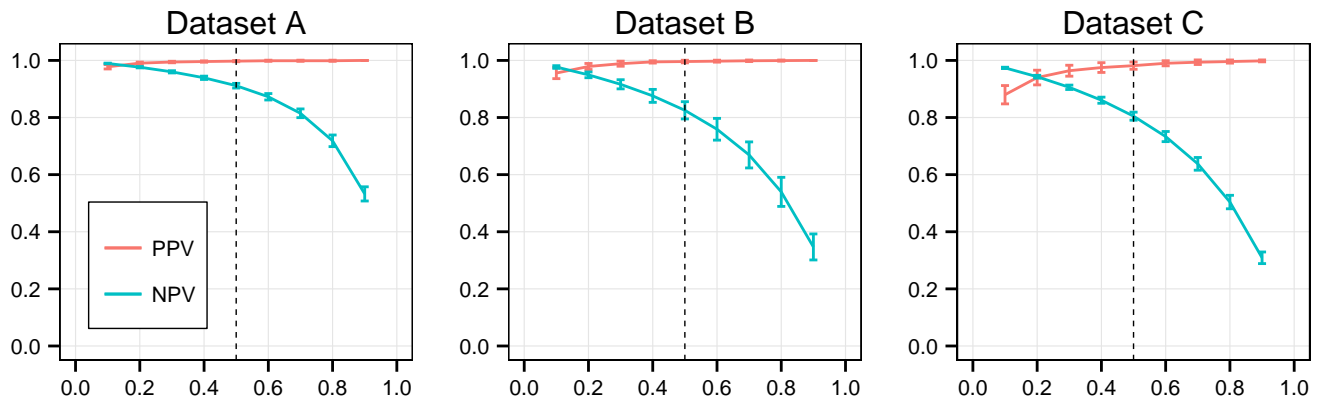

**Fig. S7.** Allerdicator positive predictive value (PPV) and negative predictive value (NPV) in relation to the ratio (prevalence) of allergens in test sets when trained and tested on datasets A, B, and C using nested 10-fold cross-validation. Error bars represent standard deviation of 10-fold nested cross-validation.

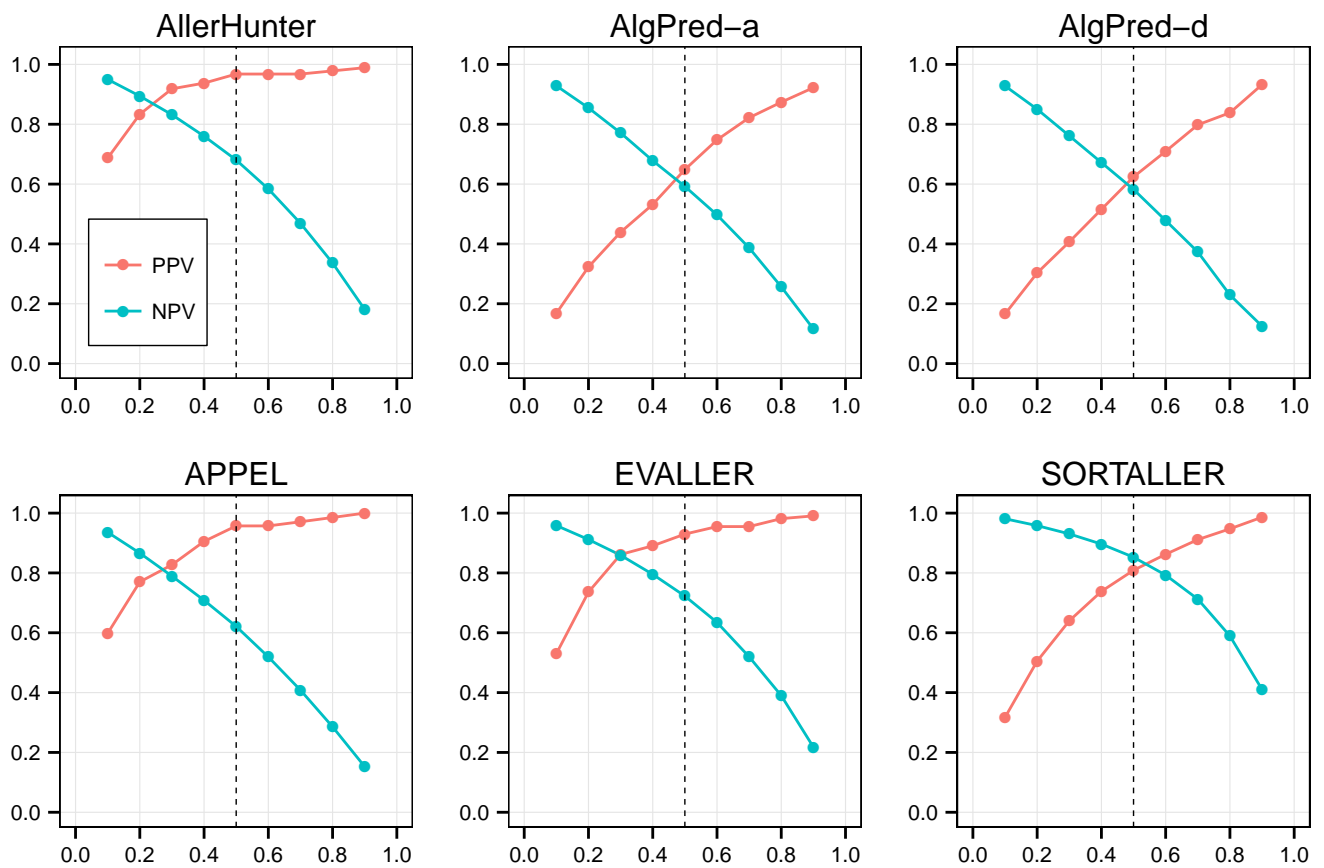

**Fig. S8.** Positive predictive value (PPV) and negative predictive value (NPV) of current allergen prediction tools in relation to the ratio (prevalence) of allergens in test sets. The tools were evaluated using a test set of 167 allergens and 1,663 non-allergens randomly drawn from dataset C (test set X used in section 3.5).



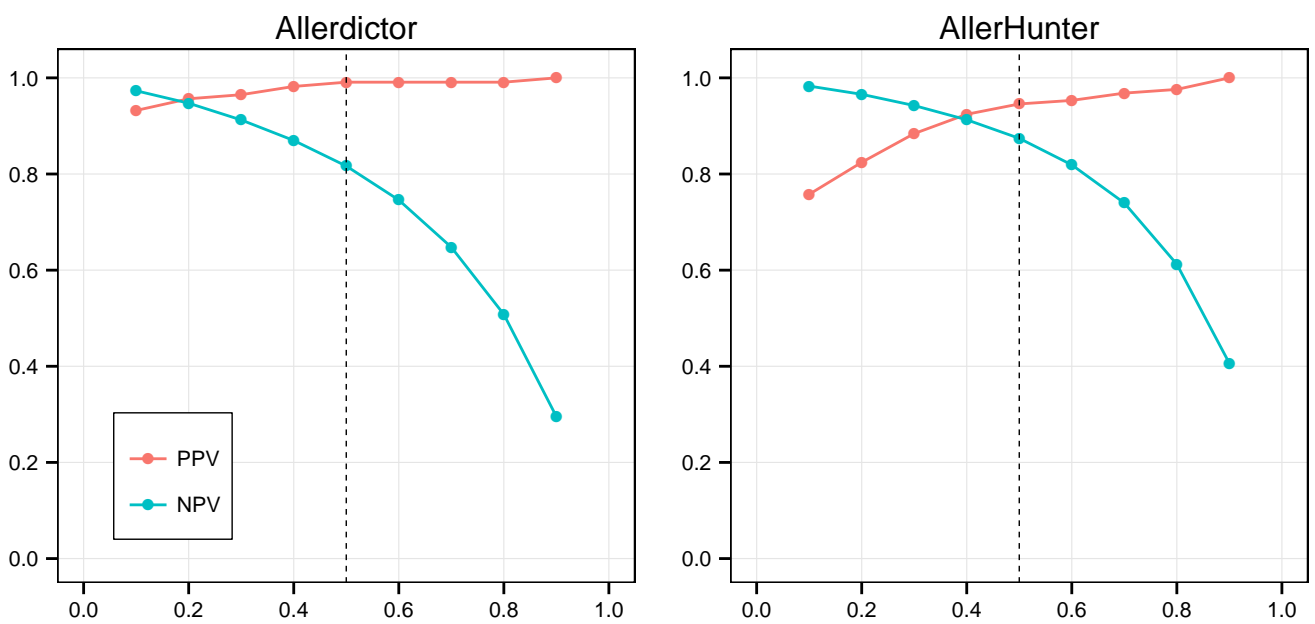

**Fig. S9.** Positive predictive value (PPV) and negative predictive value (NPV) of Allerdicator and AllerHunter in relation to the ratio (prevalence) of allergens in test sets. Both methods were trained using AllerHunter training set and evaluated using the revised AllerHunter test set.
